# Convergent evolution of sex-specific leg ornaments in Drosophilidae – from cells to structures.

K. Tanaka <sup>1\*</sup>, O. Barmina <sup>1</sup>, J. H. Massey <sup>2,3</sup>, and A. Kopp <sup>1</sup>

<sup>1</sup> Department of Evolution and Ecology, University of California – Davis, Davis CA USA

<sup>2</sup> Department of Ecology and Evolutionary Biology, University of Michigan, Ann Arbor MI USA

<sup>3</sup> Janelia Research Campus, Howard Hughes Medical Institute, Ashburn VA USA

\* Corresponding author: [kohtanaka@ucdavis.edu](mailto:kohtanaka@ucdavis.edu)

## Abstract

Sexually dimorphic morphological traits are among the fastest evolving animal features. Similar sex-specific structures have sometimes evolved independently in multiple lineages, presumably as targets of parallel sexual selection. In such cases, comparing the cellular mechanisms that generate these structures in different species can elucidate the interplay between selection and developmental constraint in evolution. In Drosophilidae, male-specific tarsal brushes on the front legs are found in at least four separate lineages. In this study, we combine phylogenetic reconstruction with developmental analyses and behavioral observations to investigate the evolutionary origin of these structures. We show that the sex brush has evolved independently at least three times from sexually monomorphic ancestral morphology. However, all sex brushes have very similar fine structure and develop through indistinguishable cellular processes, providing a striking example of developmental convergence. In all examined species, males use their sex brushes to grasp the female abdomen prior to copulation. We discuss potential reasons why convergent evolution of novel structures is rare even in the face of similar functional demands.

**Keywords:** *Drosophila* phylogeny; sexual dimorphism; convergent evolution; mating behavior; bristle development

## Introduction

Most animals are sexually dimorphic. Perhaps the most fascinating feature of sexual dimorphism is the rapid evolutionary turnover of sex-specific traits. Even among close relatives, the characters that distinguish males from females vary greatly from species to species. This simple observation implies that new sexual characters are gained, and ancestral ones are often lost, during the evolution of many if not most animal lineages. Understanding the genetic and developmental basis of this turnover is necessary to shed light on one of the most important drivers of biological diversity. Examples where similar traits have evolved multiple times are of particular value, as they often provide insights into the general patterns and mechanisms of evolution (Kopp 2009).

Most higher Diptera mate with the male on top of the female, and the male front (T1) legs are often involved in grasping or stimulating the female (Huber et al., 2007; McAlpine, 1981). Perhaps for this reason, male-specific ornaments or grasping structures are found on the T1 legs of many dipteran species (Daugeron et al., 2011; Eberhard, 2001; Ingram et al., 2008; Sivinski, 1997). In Drosophilidae, the most obvious male-specific leg modifications include the sex combs found in the *Drosophila melanogaster* and *obscura* species groups and in the genus *Lordiphosa* (Katoh et al., 2018; Kopp, 2011); branched or spoon-shaped tarsi of some Hawaiian *Drosophila* species (Hardy, 1965; Stark and O'Grady, 2009); and tarsal brushes that are the focus of this study (Figure 1). Sex brushes are found in at least four separate groups within the Drosophilidae: the *Drosophila immigrans* species group, the *loiciana* species complex, *D. repletooides*, and the genus *Zaprionus*. Due to uncertain relationships among these lineages, the evolutionary origin(s) of this structure remain unclear.

In the *immigrans* group, male sex brushes are found in some but not all of the species; the most likely scenario is that the brush was present in the last common ancestor of this clade, but was secondarily lost in the *nasuta* subgroup and greatly reduced in several other species (Rice et al., 2018). In *Zaprionus*, male brushes are present in most African species, with the exception of *Z. neglectus*, *Z. spineus*, and *Z. spinosus* (Tsacas and Chassagnard, 1990; Yassin et al., 2008; Yassin and David, 2010). The *Zaprionus* phylogeny is not fully resolved, but the distant relationship between the first species and the last two

suggests that their lack of brushes is likely to reflect independent secondary losses. The situation is more complicated among species assigned to the Oriental *Anaprius* subgenus of *Zaprionus*. Many of its members, including *Z. lineosus*, *Z. spinilineosus*, *Z. orissaensis*, *Z. multistriatus*, *Z. grandis*, and *Z. aungsani*, lack leg brushes (Gupta, 1972; Kikkawa and Peng, 1938; Okada and Carson, 1983; Wynn and Toda, 1988). However, *Anaprius* is now thought to be polyphyletic (Yassin, 2007; Yassin et al., 2010), and these species appear to be more closely related to the genus *Xenophorticella* than to *Zaprionus sensu stricto* (M. Toda, pers. comm.). Other *Anaprius* species such as *Z. bogoriensis*, *Z. obscuricornis*, and *Z. pyinoolwinensis* have leg brushes (Mainx, 1958; Okada, 1964; Wynn and Toda, 1988) and likely form a clade with the Afrotropical *Zaprionus* (M. Toda, pers. comm.). Thus, the leg brush has evolved either at or near the base of *Zaprionus*.

*D. pruinosa* belongs to the *loiciana* species complex, which also includes *D. loiciana*, *D. allochroa*, *D. pachneissa*, *D. semipruinosa*, and *D. xanthochroa*. All of these species have male leg brushes of different sizes (Tsacas, 2002; Tsacas and Chassagnard, 2000). The fourth lineage where a male leg brush is found consists of a single species, *D. repletoides*, which does not have any known close relatives; a species described originally as *D. tumiditarsus* (Tan et al., 1949) was later synonymized with *D. repletoides* (Hsu, 1943; Wheeler, 1981). Yassin (Yassin, 2007) suggested that some species currently classified as *Zaprionus* (*Z. multistriatus*, *Z. flavofasciatus*, and *Z. cercociliaris*) could in fact be more closely related to *D. repletoides* than to *Zaprionus*; unfortunately, these species have not been included in any molecular phylogenies.

The four clades of interest – *Zaprionus*, the *immigrans* species group, *D. repletoides*, and the *loiciana* complex – have never been included together in the same molecular phylogeny. Different combinations of these taxa have been examined in several phylogenetic studies, which were based on a small number of loci and produced different results. Da Lage et al (Da Lage et al., 2007) and Yassin et al (Yassin et al., 2010) provided some evidence for a distant relationship among *Zaprionus*, *D. repletoides*, and the *immigrans* species group. Russo et al (Russo et al., 2013) placed *D. pruinosa* as sister to *D. sternopleuralis* (a member of the *histrion* species group that lacks a sex brush), and the resulting clade as sister to the *immigrans* species group. The phylogenies of Da Lage et al (Da Lage et al., 2007) and Izumitani et al (Izumitani et al., 2016) did not include *D. pruinosa*,

but did not support a sister-group relationship between *D. sternopleuralis* and the *immigrans* species group.

In this study, we used a larger multilocus dataset to test whether the male leg brush evolved independently in each of these four clades, or whether its distribution could be better explained by shared origin in some of these lineages. To facilitate this analysis, we included one or more representatives of each clade, as well as several brush-less species that have been suggested by previous studies to be closely related to the brush-bearing clades. In parallel, we compared the cellular mechanisms that produce the male leg brushes in different species, as well as the role of these ornaments in mating behavior. Our results strongly suggest that the sex brushes evolved convergently in several distantly related lineages, but develop through virtually identical mechanisms.

## Materials and Methods

### *Leg imaging*

For brightfield imaging, male front legs were dissected, mounted in Hoyers media between two coverslips, and photographed on a Leica DM500B microscope with a Leica DC500 camera. For electron microscopy, adult legs were dehydrated in 100% ethanol, critical point dried, and coated with gold. Scanning electron micrographs were taken on Thermo Fisher Quattro S and Philips XL30 TMP.

### *Sequence data collection*

The sources of live *Drosophila* strains, fixed specimens, and unpublished genome assemblies used in this study are listed in Table S1. DNA was extracted from live or alcohol-fixed flies using an affinity resin based protocol (Hi Yield® Genomic DNA Mini Kit, Süd-Laborbedarf Gauting, Germany). PCR was carried out using DreamTaq polymerase (Thermo Fisher) and the following cycling conditions: 95° 5' => (95° 30" => 55° 30" => 72° 80")x35 => 72° 5' => 12°; the loci and primer sequences are listed in Table S2. In some



cases, two rounds of PCR with nested primers were needed to obtain amplicons from fixed specimens. Amplified fragments were gel-purified and sequenced from both ends using amplification primers. Sequence chromatograms were trimmed in SnapGene Viewer, and the two end reads were aligned and edited in Geneious. Heterozygous nucleotide positions, if present, were represented by IUPAC ambiguity codes. All new sequences were deposited in Genbank under accession number listed in Table S1. Additional sequences were obtained from Genbank or extracted from whole-genome assemblies using Blast v2.2.23 (Table S1).

# *Sequence analysis*

The sequences of each locus were aligned using the MUSCLE algorithm (Edgar, 2004) implemented in Geneious (Kearse et al., 2012). The alignments were trimmed at the ends, and poorly aligning intronic regions were removed. The alignments of all eight loci were then concatenated for combined analysis. Combined Bayesian analysis was carried out in MrBayes v3.2.6 (Ronquist et al., 2012). Two sets of analyses were conducted. In the first, the dataset was partitioned by gene, and each locus was allowed to follow a different nucleotide substitution model with empirically estimated parameters. In the second, we partitioned the dataset by gene and by codon position, and used PartitionFinder with the PhyML algorithm (Guindon et al., 2010; Lanfear et al., 2012; Lanfear et al., 2017) to identify the appropriate partitioning scheme; this resulted in a total of 21 character subsets, each of which was subsequently allowed to follow its own substitution model with empirically estimated parameters. For each analysis, two parallel runs of 1,500,000 generations, each starting from a different random tree, were carried out, and convergence was confirmed by comparing tree likelihoods and model parameters between the two runs. *D. melanogaster* was used as outgroup. Trees were sampled every 1000 generations and summarized after a 20% relative burn-in. Each analysis was also repeated after excluding *D. quadrilineata* (see Results). Samples of probable trees were extracted from the .tprobs file, and a strict consensus of most probable trees with combined posterior probabilities of 95% or 99% was constructed from these sets of trees in Geneious. Consensus trees were then formatted using FigTree v1.3.1 (<http://tree.bio.ed.ac.uk/software/figtree/>).

# *Immunocytochemistry and microscopy*

Fly cultures were raised on standard *Drosophila* media at room temperature. Since each species develops at a different rate, the timing of pupal stages was determined empirically based on the morphology of transverse bristle rows (TBRs). Each species was imaged at an early stage when TBR bristles of the tibia and the first tarsal segment are separated by one or more intervening epithelial cells; this stage corresponds to 16 - 21 hours after pupariation (AP) in *D. melanogaster*. Each species was also imaged at a late stage, after the packing of TBRs is completed and bristle shaft differentiation is underway (corresponding to 36+ hrs AP in *D. melanogaster*). Pupal legs were dissected, processed and immunostained as in Tanaka et al (2009). The primary antibodies used were rat anti-E-cadherin (DCAD2, from the Developmental Studies Hybridoma Bank, at 1:20) for *D. pruinosa* and *Z. tuberculatus*, and mouse anti-Armadillo (N2 7A1, DSHB; 1:30) for *D. immigrans* and *D. repletoidea*. AlexaFluor 488 secondary antibodies (Invitrogen) were used at 1:400. Fluorescent images were taken on an Olympus 1000 confocal microscope and processed using Image J and Adobe Photoshop.

# *Analysis of mating behavior*

High-speed videos of mating behavior were recorded using a Fascam Photron SA4 mounted with a 105 mm AF Micro Nikkor lens. In brief, individual virgin males were isolated upon eclosion in food vials and aged for up to two weeks. Virgin females were isolated upon eclosion and housed in groups of 20-30. Pairs of males and females were then gently aspirated into single wells of a 96 well culture plate (Corning 05-539-200) filled halfway with a hardened 2% agarose solution and sealed using a glass microscope slide and tape. Video clips were captured at 1000 frames per second (fps) using Photron Fastcam Viewer software.

## Results

### *Sex brush morphology is highly similar in distantly related species*

In all examined species of *Zaprionus*, the *immigrans* species group, *loiciana* species complex, and *D. repletoides*, the male-specific leg brush is found on the anterior-ventral surface of the first (ta1) and sometimes also the second (ta2) tarsal segment of the prothoracic leg. In females and in other species, this area is occupied by transverse bristle rows (TBRs), which the flies use to clean their head and eyes (Tokunaga 1962; Kopp 2011). The male brush replaces the distal TBRs, with a few TBRs remaining at the proximal end of ta1 (Figure 1). In the *immigrans* group (Rice et al. 2018) and in the other species (Figure 1), the brush shows several major differences from the TBRs. The bristles of each TBR are aligned into a straight, tightly packed row that is nearly perpendicular to the proximo-distal (PD) leg axis, while the consecutive TBRs along the PD axis are separated by many cell diameters. In contrast, the modified bristles (“hairs”) that make up the brush are packed closely together in all directions and do not show any regular arrangement. The shafts of the TBR bristles are robust and straight, with ridges and grooves running their length and a triangular bract at the base; the brush hairs are thin and wavy with a smooth surface, and lack bracts (Figure 1).

Although the morphology of the male leg brush is similar across species, detailed scanning electron microscopy (SEM) analysis reveals a small but consistent difference. In *D. immigrans* and *D. pruinosa*, the tips of brush hairs are thin and flat, taper to a point, and form hooks that curve toward the base of the leg (Figure 1B, D). In *D. repletoides* and in *Zaprionus*, the hair tips are noticeably thicker and curve away from the leg base (Figure 1 F, H, J, L); in *Zaprionus*, they are also flattened into paddle-like shapes (Figure 1 H, J, L). Thus, while the spatial arrangement of bristles appears to be similar in all species, some differences exist in the morphology of bristle shafts. These differences may reflect the phylogenetic relationships among these taxa, especially the close relationship between *D. pruinosa* and the *immigrans* species group (see next section).

## Male leg brushes evolved independently at least three times

We sequenced partial coding sequences of eight nuclear, protein-coding loci: *acon*, *eno*, *glyp*, *Amyrel*, *Ddc*, *Gpdh*, *Pepck*, and *Pgm*. Separate analyses of each locus produced very poorly resolved trees. We therefore combined the data from all loci (up to 9060 nucleotides per species) for a partitioned Bayesian analysis where each locus was allowed to follow its own, empirically estimated substitution model but all loci were constrained to the same tree topology. The resulting tree (Figure 2A; brush-bearing clades labeled in blue) suggests a close relationship of *D. pruinosa* to the *immigrans* species group, with the (*D. sternopleuralis* + *D. trisetosa*) clade, which belongs to the *histrion* species group, as the next outgroup. In contrast, *D. repletoides* is placed as sister group to the (*D. busckii* + *D. brachytarsa*) clade, well away from the *immigrans-pruinosa* lineage. Finally, the *Zaprionus* genus is distantly related to both *D. repletoides* and the *immigrans-pruinosa* lineage, and is placed near the base of the tree, separately from the *Drosophila* and *Sophophora* subgenera. We also note that *D. curviceps* and *D. annulipes* appear as sister groups with 100% support, while there is no support for clustering the *immigrans* species group either with the (*D. curviceps* + *D. annulipes*) clade or with *D. quadrilineata* (see Supplementary text). A strict consensus of 11 trees with the cumulative posterior probability of 95% is not resolved near the base, but does not support a close relationship among the brush-bearing lineages: *D. repletoides*, the *immigrans-pruinosa* clade, and *Zaprionus* (Figure S1).

We then examined 27 most probable trees, with the cumulative posterior probability of 99%, to determine the probability of each bipartition of interest to our study. The *Zaprionus* genus (occasionally together with *D. quadrilineata*; see below) was placed at the base of the tree, well separated from *D. repletoides* and the *immigrans-pruinosa* lineage (Figure 2A, Table S3). *D. pruinosa* clustered with the *immigrans* species group, to the exclusion of the (*D. sternopleuralis* + *D. trisetosa*) clade, with ~87% probability; the alternative grouping, of *D. pruinosa* with the (*D. sternopleuralis* + *D. trisetosa*) clade to the exclusion of the *immigrans* species group, was observed with ~13% probability. *D. repletoides* was grouped with the (*D. busckii* + *D. brachytarsa*) clade with 95% probability, and this group was separated from the *immigrans-pruinosa* lineage by multiple internal branches. In contrast, potential groupings of brush-bearing lineages – for example, of

*Zaprionus* with either *D. repletooides* or the *immigrans-pruinosa* clade, or of the *repletooides-busckii-brachytarsa* clade with the *immigrans-pruinosa* clade – were never observed among this set of probable trees.

We noticed that among these 27 probable trees, the position of *D. quadrilineata* was by far the most unstable. We therefore repeated the analysis after excluding this species. The resulting tree (Figure 2B, Table S3) shows the same relationships as the full analysis (Figure 2A), but with stronger support for most basal nodes. This tree, as well as the strict consensus of the 11 most probable trees with the cumulative posterior probability of 99% (Figure S2) places *Zaprionus* near the base of the tree, separately from the *Drosophila* and *Sophophora* subgenera; *D. pruinosa* together with the *immigrans* species group and the (*D. sternopleuralis* + *D. trisetosa*) clade; and *D. repletooides* in a clade that is clearly separated both from *Zaprionus* and from the *immigrans-pruinosa* lineage. The probability of sister-group relationship between *D. pruinosa* and the *immigrans* species groups is estimated at  $93.8\% \pm 1.32\%$  across these trees.

Finally, we carried out an analysis with a more complicated partitioning scheme, where each locus and each codon position was allowed to follow its own substitution model; this analysis was also performed with and without *D. quadrilineata*. In both cases, it produced a tree with the same topology as in the simpler partitioning scheme, but with slightly different levels of node support (Figure S3, S4 and Table S3). In summary, we find substantial though not overwhelming support for a close relationship between *D. pruinosa*, and by implication the *loiciana* species complex, and the *immigrans* species group. However, based on our data, the probability of a close relationship among the different brush-bearing clades – *D. repletooides*, *Zaprionus*, and the *immigrans-pruinosa* lineage – is very low for each of the possible pairwise relationships.

# *The same cellular processes underlie sex brush development in all species*

In *D. melanogaster*, TBR bristle precursors are specified between 6 and 12 hours after pupariation (AP) (Joshi and Orenic 2006, Schroff 2007). Initially, these cells are specified in sparse, loosely organized rows, and separated from one another by several epithelial cells. By 20-21 hrs AP, the bristle cells that are destined to make each TBR

migrate toward each other to form a straight, contiguous row, while the intervening epithelial cells are expelled distally and proximally from the TBRs (Atallah et al. 2009; Tanaka et al. 2009). This mechanism suggests two potential explanations for the tight packing of brush hairs. One possibility is that the hair progenitor cells are specified with minimal spacing; in this case, the initial spacing between hair cells is expected to be much denser than the spacing of TBR progenitors. Alternatively, hair progenitors may first be specified similarly to TBR bristles, with wide separation by epithelial cells, but expel the epithelial cells (either laterally or basally) at later stages to form a densely packed brush. In principle, independently evolved brushes in different species could utilize different cellular mechanisms to produce adult structures that are essentially indistinguishable.

In order to characterize and compare brush development in different species, we used antibodies against membrane-localized proteins to visualize cell arrangement in pupal legs. When labeled with antibodies against the beta-catenin Armadillo (Arm) or the E-cadherin Shotgun (DE-cad), bristle cells can be distinguished from the surrounding epithelial cells by their unique membrane shape (Figure 3). We examined brush development at two timepoints: an early stage roughly corresponding to ~16-21 hr AP in *D. melanogaster*, when the bristle cells of the future TBRs begin to migrate toward each other and expel the intervening epithelial cells, and a later stage when cell migration is completed. We found that at the early stage, most bristle cells in the developing brush are each surrounded by four to six epithelial cells in all species. In effect, the bristle cells are separated from one another by one to two epithelial cells (Figure 3). At the late stage, this spacing remains virtually invariant, although the cells appear more organized compared to the early stage (Figure 3). We did not see evidence of cell migration in any of the examined species. These observations indicate that despite the packed appearance similar to TBRs, the brush cells are not directly adjacent to each other, are specified at high density, and undergo minimal if any migration during development. Importantly, the cellular mechanism of brush development is very similar in all species.



# *Leg brushes are used in male mating behavior*

High-speed video recordings show that the proximal tarsal segments of the male T1 legs, including the sex brushes, are used to grab the female abdomen and resist the female's efforts to dislodge the male during copulation attempts in *Z. tuberculatus*, *D. immigrans*, and *D. repletoides* (Supplementary movies 1-3); unfortunately, no mating attempts were observed in *D. pruinosa*. In the *Drosophila melanogaster* species group, males use their sex combs, which are also located on the T1 tarsus, to grab the female genitalia as in *D. melanogaster*, or the middle abdominal segments as in *D. kikkawai*, *D. ananassae*, and *D. bipectinata* (Massey et al., 2019). In these species, male T2 and T3 legs remain on the substrate and are not involved in mating. Typically, these males proceed very quickly from mounting to attempted copulation; females may resist by walking away or using their hind legs to kick the male off. Interestingly, similar behavior is observed in *D. willistoni*, one of the closest relatives of the *melanogaster* species group that lacks sex combs (Massey et al., 2019), suggesting that the origin of the sex comb did not radically change this aspect of mating. In contrast, *D. immigrans*, *Z. tuberculatus*, and *D. repletoides* males use their sex brushes to grab females more anteriorly, near the constriction between the thorax and abdomen (Supplementary movies 1-3). In the former two species, males also use their T2 legs to grab the female mid-abdomen, while in *D. repletoides* T1, T2 and T3 legs are all used to grab the female so that the male "rides" on the female and is not in contact with the substrate. In all these species, females appear to resist mating attempts more vigorously than in the *melanogaster* group, using side-to-side bucking and wing vibrations in apparent efforts to dislodge the male, while the males use their legs to resist these efforts. The delay between mounting and attempted copulation is longer in the brush-bearing species, especially in *Z. tuberculatus*, than in the comb-bearing species; most mountings result in the male being eventually dislodged and do not lead to copulation attempts.

A more systematic analysis, including many lineages that lack male-specific leg modifications, will be needed to test whether morphological evolution correlates with the evolution of behavior. At this point, we can only speculate that male leg brushes, which consist of hundreds of thin hairs that are hooked at the tips and have a very large combined



surface area, may have evolved to provide a more secure grip of the female abdomen, especially if stronger grip is needed to counteract the female attempts to dislodge the male.

## Discussion

### *Repeated evolution of leg brushes*

Our results suggest that the male-specific brush on the tarsal segments of front legs has evolved independently at least three times in Drosophilidae: in *Zaprionus*, in *D. repletoides*, and in the common ancestor of the *immigrans* species group and the *loiciana* complex, which includes *D. pruinosa*. Although our study does not provide unequivocal support for a sister-group relationship between *D. pruinosa* and the *immigrans* group (a closer relationship of *D. pruinosa* to the *sternopleuralis-trisetosa* clade cannot be completely ruled out, and of course there may exist other closely related species that we have not sampled), independent evolution of brushes in the *immigrans* species group and the *loiciana* species complex appears less likely than a single origin in a common ancestor of these clades. The proximally curving tips of brush hairs in *D. pruinosa* and *D. immigrans*, distinct from the distally curving tips in *Zaprionus* and *D. repletoides* (Fig. 1), are consistent with a close relationship between the *immigrans* group and the *loiciana* species complex.

Convergent origin of leg brushes in *Zaprionus*, *D. repletoides*, and the *immigrans-loiciana* clade is remarkable given the strong structural similarities of these brushes, and especially the fact that the cellular mechanisms that produce them in different species are essentially identical. In all species examined, the bristles that make up the sex brush are specified with only one or two intervening epithelial cells between them. Bristle specification in *Drosophila* and other insects is governed by a lateral inhibition mechanism, which is based on contact signaling between adjacent cells, and prevents two adjacent cells from both assuming the fate of bristle precursors (Simpson, 1990). Later in development, a tighter packing of bristles can be achieved through cell migration, as observed for example in the transverse bristle rows of the front legs (Atallah et al., 2009; Tanaka et al., 2009). However, no cell migration is observed during sex brush development; instead, the future

brush hairs are always specified at the maximum density allowed by lateral inhibition. Independent evolution of this highly derived spatial pattern in multiple lineages suggests that similar selective pressures may elicit not only similar structures, but also similar changes in the underlying developmental mechanisms.

# *A hierarchy of convergence, from structures to genes*

Convergence is a pervasive phenomenon in evolution. Pictures comparing bats and birds, fish and dolphins, or the vertebrate and cephalopod eyes are textbook clichés. Less obvious but equally striking examples of convergent forms shaped by a common function include the asymmetrical ears of owls (Nishikawa, 2002), Mullerian mimicry in butterflies (Brower, 1994; Naisbit et al., 2003), trophic morphology in cichlid fishes (Ruber and Adams, 2001), and many others (Moore and Willmer, 1997). A fundamental question raised by the widespread occurrence of convergent traits is to what extent phenotypic convergence reflects an underlying similarity of the molecular and cellular mechanisms that control individual development.

The mechanisms of convergence can be viewed in either genetic or developmental terms. From the genetic standpoint, convergent phenotypes are controlled by the same mechanism if they are the result of changes in the same loci (“genetic convergence”) (Gompel and Prud'homme, 2009; Martin and Orgogozo, 2013). Alternatively, convergent changes may be considered to share a similar mechanism if they are produced by the same changes in development, regardless of the ultimate genetic causes (“developmental convergence”) (Wake, 1991; Wake et al., 2011; Wray, 2002). We can describe convergence in hierarchical terms by applying three increasingly stringent criteria: phenotypic, developmental, and genetic. Phenotypic convergence can occur without developmental convergence: for example, the disproportionally elongated bodies of burrowing salamanders can be caused either by an increase in the number of vertebrae, or by increased length of the individual vertebrae – a superficial phenotypic resemblance produced by entirely different developmental mechanisms (Parra-Olea and Wake, 2001). Similarly, larval abdominal prolegs of butterflies and sawflies, while superficially similar and playing similar roles in locomotion, develop from non-homologous leg segments

(Suzuki and Palopoli, 2001). In *D. melanogaster*, latitudinal clines in wing size have evolved on several continents, but the differences in wing size are due largely to differences in cell number in some populations, while in other populations differences in the size of individual cells make a larger contribution (James et al., 1997; Zwaan et al., 2000).

Developmental convergence, in turn, does not necessarily reflect genetic convergence. In *Drosophila*, similar color patterns can evolve in different species through changes at different loci (Signor et al., 2016; Wittkopp et al., 2003b; Yassin et al., 2016), but in the end all of these genetic changes are translated into adult phenotypes through the same set of enzymatic reactions in the catecholamine metabolism pathway (Kronforst et al., 2012; Wittkopp and Beldade, 2009; Wittkopp et al., 2003a), presenting an example of developmental convergence in the absence of genetic convergence. In other cases, the evolution of similar phenotypes in distantly related species is clearly caused by independent changes in the same genes – as, for example, in the loss of larval cuticular hairs through regulatory mutations in the *shavenbaby* gene in two *Drosophila* species separated by >40 million years (Sucena et al., 2003), or in the evolution of mimetic wing color patterns in different species of *Heliconius* butterflies through parallel changes in the *optix* and *WntA* genes (Gallant et al., 2014; Hines et al., 2011; Martin et al., 2012; Reed et al., 2011; Supple et al., 2013).

Going even deeper from the genetic to the molecular level, we can ask whether recurrent involvement of the same gene in multiple instances of convergent evolution reflects repeated appearance of the same mutations, or whether different mutations can alter the function of the causative gene in similar ways, leading to the evolution of similar phenotypes. Again, we can find examples in support of either scenario. A variety of proteins have evolved similar amino acid residues and active sites repeatedly in different taxa (Gasparini et al., 1998; Hill et al., 2019; Kriener et al., 2000; Lopreato et al., 2001; Yokoyama, 2002). Although non-coding DNA sequences are clearly less constrained in their function than proteins, similar regulatory mutations can nevertheless appear and be fixed independently in different populations or species in response to similar selective pressures (Chan et al., 2010; Loehlin et al., 2019; Xie et al., 2019). Conversely, mutations that affect different amino acids, or different *cis*-regulatory elements, can produce similar

phenotypic outcomes in different populations or species (Gross et al., 2009; Kingsley et al., 2009; Manceau et al., 2010; Protas et al., 2006; Rosenblum et al., 2009; Yassin et al., 2016).

The sex brush represents a clear case of developmental convergence, but the genetic control of its development remains to be determined. Specification and positioning of the sex brush are likely to involve the HOX gene *Scr* and the sex determination gene *doublesex* (Rice et al., 2018; Tanaka et al., 2011). However, the identity of the downstream genes that translate the regulatory information provided by *dsx* and *Scr* into the final 3-dimensional structure is unknown. In principle, these genes need not be the same in different lineages. Future work may show whether the convergence we observe at the level of cell behavior extends to the genetic and molecular level.

# *Convergent innovation and the failure to innovate*

The evolution of similar structures in response to similar functional demands is perhaps not surprising; should we instead be surprised when organisms faced with similar demands *fail to evolve* convergent phenotypes (Blount et al., 2018)? Males grasp female abdomen with their front legs in many *Drosophila* species, including those that primitively lack any male-specific leg ornaments (Massey et al., 2019; Spieth, 1952). Why don't all *Drosophila* species evolve sex combs, brushes, or other grasping structures? Development does not provide any clues. At the level of cell behavior, both the ancestral/female condition (cell migration that produces tightly packed bristle rows from sparsely spaced precursors) and the derived/male condition (specification of bristle precursors at the maximum density permitted by lateral inhibition) are the same in all lineages where the sex brush is present. There is no a priori reason to think that the transition between these modes of development is easier in some species than others.

The answer may lie instead in either behavior or population genetics. Although males of different species use their sex brushes in at least superficially similar ways, we don't know the female side of the story. If females of different species vary in their responses to male grasping, the evolution of specialized leg structures in males may not be universally favored. This may also explain why both the sex brushes and the sex combs (Kopp, 2011) have been secondarily lost multiple times. Moreover, it is difficult to know

whether the female preferences observed today are the same as they were in the distant past when the male-specific structures evolved (Watts et al., 2019).

Alternatively, the origin of a new trait such as the leg brush may require such an unlikely series of genetic changes that it may often fail to occur even in response to strong selective pressure. For example, it is possible that while a single mutation is sufficient to modify or eliminate an existing morphological structure, the origin of a *new* structure may require simultaneous changes in multiple genes. From the population-genetic perspective, this would mean that functionally novel and positively interacting alleles at multiple loci must segregate in the same population at the same time in order for selection in favor of a new structure to be effective. Naturally, this would greatly reduce the probability of evolutionary innovations compared to other types of phenotypic change. This is of course pure speculation; we do not know why convergent innovations evolve in some lineages but fail to evolve in others. We hope that research models where both the functional roles and the genetic basis of novel traits can be studied in parallel will shed some light on this intriguing question in the future.

## Acknowledgements

We thank the US *Drosophila* species stock center, Ehime University *Drosophila* stock center, J.-R. David, S. Prigent, and M. Watada for *Drosophila* strains and specimens; Developmental Studies Hybridoma Bank for antibodies; A. Comeault, A. Gloss, M. Lang, D. Matute, D. Miller, V. Orgogozo, and N. Whiteman for genome assemblies; M. Toda for advice on *Zaprionus* phylogeny; G. Rice for *D. immigrans* images; and A. Yassin for comments on the manuscript. We also thank the MCB Light Microscopy Imaging Facility, Department of Cell Biology and Human Anatomy EM Lab, and Materials Science and Engineering AMCaT Lab at UC Davis for equipment and imaging assistance, and Gwyneth Card and W. Ryan Williamson for use of the Photron camera. The Olympus FV1000 confocal used in this study was purchased using NIH Shared Instrumentation Grant 1S10RR019266-01. AK and OB are grateful to N. Gompel for allowing some of this work to be conducted in his lab while on a sabbatical visit, and to members of the Gompel lab for treating them as their labmates. This work was

506 supported by NIH grant 5R35GM122592 to AK and by funds from Ludwig-Maximilians-  
507 Universität München to Nicolas Gompel.

## Supplemental text - The *immigrans* species group

The *immigrans* species group and the wider *immigrans-tripunctata* radiation have long played a pivotal role in *Drosophila* systematics (Throckmorton, 1975; Yassin, 2013). However, the composition of the *immigrans* group has not been entirely clear. Historically, this group was proposed to include five subgroups: *immigrans*, *hypocausta*, *nasuta*, *quadrilineata*, and *curviceps* (Huang et al., 2002; Zhang and Toda, 1988, 1992; Zhang et al., 1995). Recent studies have shown, however, that both the *hypocausta* and the *immigrans* subgroups are likely polyphyletic, as some species assigned to these subgroups are actually closer to the *nasuta* subgroup (Da Lage et al., 2007; Katoh et al., 2007; Rice et al., 2018). The *quadrilineata* and *curviceps* subgroups have been the source of even greater complications. Previous phylogenetic studies have provided evidence against a sister-group relationship between *D. quadrilineata* and the rest of the *immigrans* species group (Katoh et al., 2007; Morales-Hojas and Vieira, 2012; Yassin, 2013). Moreover, *D. annulipes*, traditionally assigned to the *quadrilineata* subgroup (Lin and Tseng, 1973), was found to be distantly related to *D. quadrilineata*, and closer to the *virilis-repleta* radiation (Katoh et al., 2007). The phylogeny of Huang et al (Huang et al., 2002) showed a close relationship between *D. annulipes* and the clade composed of *D. curviceps* and *D. oritisa*, another species assigned to the *curviceps* subgroup. Morales-Hojas and Vieira (Morales-Hojas and Vieira, 2012) confirmed the distant relationship between *D. annulipes* and *D. quadrilineata*, as well as between *D. annulipes* and the *immigrans* species group *sensu stricto*. Yassin (Yassin, 2013) pointed out important differences between *D. quadrilineata* and the *curviceps* subgroup and the *immigrans* group *s.s.* Finally, Pradhan et al (Pradhan et al., 2015) removed the *curviceps* subgroup from the *immigrans* species group, elevating it to the status of a separate species group.

Our analysis, based on a larger amount of sequence data than previous studies, confirms these observations, namely that (1) *D. quadrilineata* is not closely related either to the *immigrans* species group *s.s.* or to *D. annulipes*, (2) *D. curviceps* is not closely related to the *immigrans* species group *s.s.*, and (3) *D. annulipes* is related to *D. curviceps*. Based on these results, we support the conclusions on other authors (Katoh et al., 2007; Pradhan et al., 2015; Yassin, 2013) that the definition of the *immigrans* species group should be



restricted to the *immigrans*, *hypocausta*, and *nasuta* subgroups. Further work, with a more extensive sampling of the *immigrans* group *s.s.*, is needed to revise its internal taxonomy and re-establish monophyletic subgroups. Similarly, better taxon sampling will be needed to determine whether *D. annulipes* could be reassigned to the *curviceps* species group (Pradhan et al., 2015), or whether it is possible to establish a monophyletic *quadrilineata* species group.

# References

- Atallah, J., Liu, N.H., Dennis, P., Hon, A., Godt, D., and Larsen, E.W. (2009). Cell dynamics and developmental bias in the ontogeny of a complex sexually dimorphic trait in *Drosophila melanogaster*. *Evol Dev* 11, 191-204.
- Blount, Z.D., Lenski, R.E., and Losos, J.B. (2018). Contingency and determinism in evolution: Replaying life's tape. *Science* 362.
- Brower, A.V. (1994). Rapid morphological radiation and convergence among races of the butterfly *Heliconius erato* inferred from patterns of mitochondrial DNA evolution. *Proc Natl Acad Sci U S A* 91, 6491-6495.
- Chan, Y.F., Marks, M.E., Jones, F.C., Villarreal, G., Jr., Shapiro, M.D., Brady, S.D., Southwick, A.M., Absher, D.M., Grimwood, J., Schmutz, J., *et al.* (2010). Adaptive evolution of pelvic reduction in sticklebacks by recurrent deletion of a *Pitx1* enhancer. *Science* 327, 302-305.
- Da Lage, J.-L., Kergoat, G.J., Maczkowiak, F., Silvain, J.-F., Cariou, M.-L., and Lachaise, D. (2007). A phylogeny of *Drosophilidae* using the *Amyrel* gene: questioning the *Drosophila melanogaster* species group boundaries. *J Zool Syst Evol Res* 45, 47-63.
- Daugeron, C., Plant, A., Winkler, I., Stark, A., and Baylac, M. (2011). Extreme male leg polymorphic asymmetry in a new empidine dance fly (Diptera: Empididae). *Biology letters* 7, 11-14.
- Eberhard, W.G. (2001). The functional morphology of species-specific clasping structures on the front legs of male *Archiseptis* and *Palaeoseptis* flies (Diptera, Sepsidae). *Zoological Journal of the Linnean Society* 133, 335-368.
- Edgar, R.C. (2004). MUSCLE: a multiple sequence alignment method with reduced time and space complexity. *BMC Bioinformatics* 5, 113.
- Gallant, J.R., Imhoff, V.E., Martin, A., Savage, W.K., Chamberlain, N.L., Pote, B.L., Peterson, C., Smith, G.E., Evans, B., Reed, R.D., *et al.* (2014). Ancient homology underlies adaptive mimetic diversity across butterflies. *Nature communications* 5, 4817.
- Gasparini, S., Danse, J.M., Lecoq, A., Pinkasfeld, S., Zinn-Justin, S., Young, L.C., de Medeiros, C.C., Rowan, E.G., Harvey, A.L., and Menez, A. (1998). Delineation of the functional site of alpha-dendrotoxin. The functional topographies of dendrotoxins are different but share a conserved core with those of other Kv1 potassium channel-blocking toxins. *J Biol Chem* 273, 25393-25403.
- Gompel, N., and Prud'homme, B. (2009). The causes of repeated genetic evolution. *Dev Biol* 332, 36-47.
- Gross, J.B., Borowsky, R., and Tabin, C.J. (2009). A novel role for *Mc1r* in the parallel evolution of depigmentation in independent populations of the cavefish *Astyanax mexicanus*. *PLoS Genet* 5, e1000326.
- Guindon, S., Dufayard, J.F., Lefort, V., Anisimova, M., Hordijk, W., and Gascuel, O. (2010). New algorithms and methods to estimate maximum-likelihood phylogenies: assessing the performance of PhyML 3.0. *Syst Biol* 59, 307-321.
- Gupta, J.P. (1972). *D. orissaensis*, a new species of *Drosophila* from Orissa, India. *Oriental Insects* 6, 561-563.
- Hardy, D.E. (1965). Diptera: Cyclorrhapha II, series Schizophora, section Acalypterae I, family Drosophilidae. . In *Insects of Hawaii*, E.C. Zimmerman, ed. (Honolulu: University of Hawaii Press).

Hill, J., Enbody, E.D., Pettersson, M.E., Sprehn, C.G., Bekkevold, D., Folkvord, A., Laikre, L., Kleinau, G., Scheerer, P., and Andersson, L. (2019). Recurrent convergent evolution at amino acid residue 261 in fish rhodopsin. *Proc Natl Acad Sci U S A* *116*, 18473-18478.

Hines, H.M., Counterman, B.A., Papa, R., Albuquerque de Moura, P., Cardoso, M.Z., Linares, M., Mallet, J., Reed, R.D., Jiggins, C.D., Kronforst, M.R., *et al.* (2011). Wing patterning gene redefines the mimetic history of *Heliconius* butterflies. *Proc Natl Acad Sci U S A* *108*, 19666-19671.

Hsu, T.C. (1943). Chromosomes of *Drosophila repletoidea*. *Kwangsi Agric* *4*, 155-160.

Huang, J., Hao, L., Liu, S., Li, L., Zhang, W.-X., and Dai, Z.-H. (2002). Phylogenetic position of Chinese endemic *Drosophila curviceps* species subgroup in the *Drosophila immigrans* group. *Acta Genetica Sinica* *29*, 417-423.

Huber, B.A., Sinclair, B.J., and Schmitt, M. (2007). The evolution of asymmetric genitalia in spiders and insects. *Biol Rev* *82*, 647-698.

Ingram, K.K., Laamanen, T., Puniamoorthy, N., and Meier, R. (2008). Lack of morphological coevolution between male forelegs and female wings in *Themira* (Sepsidae : Diptera : Insecta). *Biological Journal of the Linnean Society* *93*, 227-238.

Izumitani, H.F., Kusaka, Y., Koshikawa, S., Toda, M.J., and Katoh, T. (2016). Phylogeography of the Subgenus *Drosophila* (Diptera: Drosophilidae): Evolutionary History of Faunal Divergence between the Old and the New Worlds. *PLoS ONE* *11*, e0160051.

James, A.C., Azevedo, R.B., and Partridge, L. (1997). Genetic and environmental responses to temperature of *Drosophila melanogaster* from a latitudinal cline. *Genetics* *146*, 881-890.

Katoh, T., Nakaya, D., Tamura, K., and Aotsuka, T. (2007). Phylogeny of the *Drosophila immigrans* species group (Diptera: Drosophilidae) based on *Adh* and *Gpdh* sequences. *Zoolog Sci* *24*, 913-921.

Katoh, T.K., Zhang, G., Toda, M.J., Zhang, W.X., and Gao, J.J. (2018). The *Lordiphosa denticeps* species group (Diptera: Drosophilidae) in China, with redescription of four known species and descriptions of nine new species. *Zootaxa* *4471*, 37-75.

Kearse, M., Moir, R., Wilson, A., Stones-Havas, S., Cheung, M., Sturrock, S., Buxton, S., Cooper, A., Markowitz, S., Duran, C., *et al.* (2012). Geneious Basic: an integrated and extendable desktop software platform for the organization and analysis of sequence data. *Bioinformatics* *28*, 1647-1649.

Kikkawa, H., and Peng, F.T. (1938). *Drosophila* species of Japan and adjacent localities. *Japanese Journal of Zoology* *7*, 507-552.

Kingsley, E.P., Manceau, M., Wiley, C.D., and Hoekstra, H.E. (2009). Melanism in *peromyscus* is caused by independent mutations in *agouti*. *PLoS ONE* *4*, e6435.

Kopp, A. (2011). *Drosophila* Sex Combs as a Model of Evolutionary Innovations. *Evol Dev* *13*, 504-522.

Kriener, K., O'HUigin, C., Tichy, H., and Klein, J. (2000). Convergent evolution of major histocompatibility complex molecules in humans and New World monkeys. *Immunogenetics* *51*, 169-178.

Kronforst, M.R., Barsh, G.S., Kopp, A., Mallet, J., Monteiro, A., Mullen, S.P., Protas, M., Rosenblum, E.B., Schneider, C.J., and Hoekstra, H.E. (2012). Unraveling the thread of nature's tapestry: the genetics of diversity and convergence in animal pigmentation. *Pigment cell & melanoma research* *25*, 411-433.

Lanfear, R., Calcott, B., Ho, S.Y., and Guindon, S. (2012). Partitionfinder: combined selection of partitioning schemes and substitution models for phylogenetic analyses. *Mol Biol Evol* 29, 1695-1701.

Lanfear, R., Frandsen, P.B., Wright, A.M., Senfeld, T., and Calcott, B. (2017). PartitionFinder 2: New Methods for Selecting Partitioned Models of Evolution for Molecular and Morphological Phylogenetic Analyses. *Mol Biol Evol* 34, 772-773.

Lin, F.-J., and Tseng, H.-C. (1973). The *Drosophila* immigrans species group in Taiwan with descriptions of five new species. *Bull Inst Zool, Academia Sinica* 12, 13-26.

Loehlin, D.W., Ames, J.R., Vaccaro, K., and Carroll, S.B. (2019). A major role for noncoding regulatory mutations in the evolution of enzyme activity. *Proc Natl Acad Sci U S A* 116, 12383-12389.

Lopreato, G.F., Lu, Y., Southwell, A., Atkinson, N.S., Hillis, D.M., Wilcox, T.P., and Zakon, H.H. (2001). Evolution and divergence of sodium channel genes in vertebrates. *Proc Natl Acad Sci U S A* 98, 7588-7592.

Mainx, F. (1958). *Zaprionus bogoriensis* spec. nov., eine neue Drosophilide aus Java. *Zoologischer Anzeiger* 161, 126-130.

Manceau, M., Domingues, V.S., Linnen, C.R., Rosenblum, E.B., and Hoekstra, H.E. (2010). Convergence in pigmentation at multiple levels: mutations, genes and function. *Philos T R Soc B* 365, 2439-2450.

Martin, A., and Orgogozo, V. (2013). The Loci of repeated evolution: a catalog of genetic hotspots of phenotypic variation. *Evolution* 67, 1235-1250.

Martin, A., Papa, R., Nadeau, N.J., Hill, R.I., Counterman, B.A., Halder, G., Jiggins, C.D., Kronforst, M.R., Long, A.D., McMillan, W.O., *et al.* (2012). Diversification of complex butterfly wing patterns by repeated regulatory evolution of a Wnt ligand. *Proc Natl Acad Sci U S A* 109, 12632-12637.

Massey, J.H., Chung, D., Siwanowicz, I., Stern, D.L., and Wittkopp, P. (2019). The yellow gene influences *Drosophila* male mating 1 success through sex comb melanization. *eLife in press*.

McAlpine, J.F. (1981). Morphology and terminology - adults. In *Manual of Nearctic Diptera*, J.F. McAlpine, B.V. Peterson, G.E. Shewell, H.J. Teskey, J.R. Vockeroth, and D.M. Wood, eds. (Ottawa: Research Branch, Agriculture Canada), pp. 9--63.

Moore, J., and Willmer, P. (1997). Convergent evolution in invertebrates. *Biol Rev Camb Philos Soc* 72, 1-60.

Morales-Hojas, R., and Vieira, J. (2012). Phylogenetic patterns of geographical and ecological diversification in the subgenus *Drosophila*. *PLoS ONE* 7, e49552.

Naisbit, R.E., Jiggins, C.D., and Mallet, J. (2003). Mimicry: developmental genes that contribute to speciation. *Evol Dev* 5, 269-280.

Nishikawa, K.C. (2002). Evolutionary convergence in nervous systems: insights from comparative phylogenetic studies. *Brain Behav Evol* 59, 240-249.

Okada, T. (1964). *Drosophilidae* (Diptera) of Southeast Asia collected by the Thai-Japanese Biological Expedition 1961-62. In *Nature and Life in Southeast Asia*, T.a.U. Kira, T., ed. (Kyoto: Fauna and Flora Research Society), pp. 439-466.

Okada, T., and Carson, H.L. (1983). The genera *Phorticella* Duda and *Zaprionus* Coquillett (Diptera, Drosophilidae) of the Oriental region and New Guinea. *Kontyu* 51, 539-553.

Parra-Olea, G., and Wake, D.B. (2001). Extreme morphological and ecological homoplasy in tropical salamanders. *Proc Natl Acad Sci U S A* 98, 7888-7891.

Pradhan, S., Sati, P.C., Fartyal, R.S., Chatterjee, R.N., Sarswat, M., Kandpal, M.C., and Singh, B.K. (2015). *Drosophila curviceps* Species-Group (Diptera: Drosophilidae) from India, with Description of a New Species and Redescription of a Known Species. *Proceedings of the Zoological Society* 68, 178-183.

Protas, M.E., Hersey, C., Kochanek, D., Zhou, Y., Wilkens, H., Jeffery, W.R., Zon, L.I., Borowsky, R., and Tabin, C.J. (2006). Genetic analysis of cavefish reveals molecular convergence in the evolution of albinism. *Nat Genet* 38, 107-111.

Reed, R.D., Papa, R., Martin, A., Hines, H.M., Counterman, B.A., Pardo-Diaz, C., Jiggins, C.D., Chamberlain, N.L., Kronforst, M.R., Chen, R., *et al.* (2011). *optix* drives the repeated convergent evolution of butterfly wing pattern mimicry. *Science* 333, 1137-1141.

Rice, G., Barmina, O., Hu, K., and Kopp, A. (2018). Evolving doublesex expression correlates with the origin and diversification of male sexual ornaments in the *Drosophila immigrans* species group. *Evol Dev* 20, 78-88.

Ronquist, F., Teslenko, M., van der Mark, P., Ayres, D.L., Darling, A., Hohna, S., Larget, B., Liu, L., Suchard, M.A., and Huelsenbeck, J.P. (2012). MrBayes 3.2: efficient Bayesian phylogenetic inference and model choice across a large model space. *Syst Biol* 61, 539-542.

Rosenblum, E.B., Rompler, H., Schoneberg, T., and Hoekstra, H.E. (2009). Molecular and functional basis of phenotypic convergence in white lizards at White Sands. *Proc Natl Acad Sci U S A*.

Ruber, L., and Adams, D.C. (2001). Evolutionary convergence of body shape and trophic morphology in cichlids from Lake Tanganyika. *J Evol Biol* 13, 325.

Russo, C.A., Mello, B., Frazao, A., and Voloch, C.M. (2013). Phylogenetic analysis and a time tree for a large drosophilid data set (Diptera: Drosophilidae). *Zoological Journal of the Linnean Society* 169, 765-775.

Signor, S.A., Liu, Y., Rebeiz, M., and Kopp, A. (2016). Genetic Convergence in the Evolution of Male-Specific Color Patterns in *Drosophila*. *Curr Biol* 26, 2423-2433.

Simpson, P. (1990). Lateral inhibition and the development of the sensory bristles of the adult peripheral nervous system of *Drosophila*. *Development* 109, 509-519.

Sivinski, J. (1997). Ornaments in the Diptera. *Florida Entomologist* 80, 142-164.

Spieth, H.T. (1952). Mating behavior within the genus *Drosophila* (Diptera). *Bulletin of the American Museum of Natural History* 99, 395-474.

Stark, J.B., and O'Grady, P.M. (2009). Morphological variation in the forelegs of the Hawaiian *Drosophilidae*. I. The AMC clade. *J Morphol*.

Sucena, E., Delon, I., Jones, I., Payre, F., and Stern, D.L. (2003). Regulatory evolution of *shavenbaby/ovo* underlies multiple cases of morphological parallelism. *Nature* 424, 935-938.

Supple, M.A., Hines, H.M., Dasmahapatra, K.K., Lewis, J.J., Nielsen, D.M., Lavoie, C., Ray, D.A., Salazar, C., McMillan, W.O., and Counterman, B.A. (2013). Genomic architecture of adaptive color pattern divergence and convergence in *Heliconius* butterflies. *Genome Res* 23, 1248-1257.

Suzuki, Y., and Palopoli, M.F. (2001). Evolution of insect abdominal appendages: are prolegs homologous or convergent traits? *Development Genes and Evolution* 211, 486-492.

Tan, C.C., Hsu, T.C., and Sheng, T.C. (1949). Known *drosophila* species in China with descriptions of twelve new species. In *Studies in the genetics of Drosophila VI Articles on genetics, cytology, and taxonomy*, J.T. Patterson, ed. (Austin, TX: University of Texas Publications), pp. 196-206.



Tanaka, K., Barmina, O., and Kopp, A. (2009). Distinct developmental mechanisms underlie the evolutionary diversification of *Drosophila* sex combs. *Proceedings of the National Academy of Sciences* 106, 4764-4769.

Tanaka, K., Barmina, O., Sanders, L.E., Arbeitman, M.N., and Kopp, A. (2011). Evolution of Sex-Specific Traits through Changes in HOX-Dependent doublesex Expression. *PLoS Biol* 9, e1001131.

Throckmorton, L.H. (1975). The phylogeny, ecology, and geography of *Drosophila*. In *Handbook of Genetics*, R.C. King, ed. (Plenum Press: Plenum Press), pp. 421-469.

Tsacas, L. (2002). Le nouveau complexe africain *Drosophila loiciana* et l'espèce apparentée *D. matileana* n. sp. (Diptera : Drosophilidae). *Ann Soc entomol Fr* 38, 57-70.

Tsacas, L., and Chassagnard, M.-T. (2000). *Drosophila loiciana*, nouvelle espèce africaine et redescription de son espèce affine *D. pruinosa* Dudas (Diptera, Drosophilidae). *Revue française d'entomologie* 22, 213-222.

Tsacas, L., and Chassagnard, M.T. (1990). The Species of the Genus *Zaprionus* with the Fore Femora Bearing Spines (Diptera, Drosophilidae). *Annales De La Societe Entomologique De France* 26, 461-487.

Wake, D.B. (1991). Homoplasy - the Result of Natural-Selection, or Evidence of Design Limitations. *American Naturalist* 138, 543-567.

Wake, D.B., Wake, M.H., and Specht, C.D. (2011). Homoplasy: from detecting pattern to determining process and mechanism of evolution. *Science* 331, 1032-1035.

Watts, J.C., Flynn, A., Tenhumberg, B., and Hebets, E.A. (2019). Contemporary sexual selection does not explain variation in male display traits among populations. *Evolution*.

Wheeler, M.R. (1981). The Drosophilidae. In *The Genetics and Biology of Drosophila*, M. Ashburner, H.L. Carson, and J.N. Thompson, eds. (Academic Press), pp. 1-97.

Wittkopp, P.J., and Beldade, P. (2009). Development and evolution of insect pigmentation: genetic mechanisms and the potential consequences of pleiotropy. *Semin Cell Dev Biol* 20, 65-71.

Wittkopp, P.J., Carroll, S.B., and Kopp, A. (2003a). Evolution in black and white: genetic control of pigment patterns in *Drosophila*. *Trends Genet* 19, 495-504.

Wittkopp, P.J., Williams, B.L., Selegue, J.E., and Carroll, S.B. (2003b). *Drosophila* pigmentation evolution: divergent genotypes underlying convergent phenotypes. *Proc Natl Acad Sci U S A* 100, 1808-1813.

Wray, G.A. (2002). Do convergent developmental mechanisms underlie convergent phenotypes? *Brain Behav Evolut* 59, 327-336.

Wynn, S., and Toda, M.J. (1988). Drosophilidae (Diptera) in Burma. IV. The genus *Zaprionus*. *Kontyu* 56, 843-851.

Xie, K.T., Wang, G., Thompson, A.C., Wucherpennig, J.I., Reimchen, T.E., MacColl, A.D.C., Schluter, D., Bell, M.A., Vasquez, K.M., and Kingsley, D.M. (2019). DNA fragility in the parallel evolution of pelvic reduction in stickleback fish. *Science* 363, 81-84.

Yassin, A. (2007). A revision of the tumiditarsus group of the subgenus *Drosophila* and its relation to the genus *Zaprionus*. *Drosophila Information Service* 90, 20-22.

Yassin, A. (2013). Phylogenetic classification of the Drosophilidae Rondani (Diptera): the role of morphology in the postgenomic era. *Systematic Entomology* 38, 349-364.

Yassin, A., Araripe, L.O., Capy, P., Da Lage, J.L., Klaczko, L.B., Maisonhaute, C., Ogereau, D., and David, J.R. (2008). Grafting the molecular phylogenetic tree with morphological

branches to reconstruct the evolutionary history of the genus *Zaprionus* (Diptera: Drosophilidae). *Mol Phylogenet Evol* 47, 903-915.

Yassin, A., Da Lage, J.L., David, J.R., Kondo, M., Madi-Ravazzi, L., Prigent, S.R., and Toda, M.J. (2010). Polyphyly of the *Zaprionus* genus group (Diptera: Drosophilidae). *Mol Phylogenet Evol* 55, 335-339.

Yassin, A., and David, J.R. (2010). Revision of the Afrotropical species of *Zaprionus* (Diptera, Drosophilidae), with descriptions of two new species and notes on internal reproductive structures and immature stages. *ZooKeys* 51, 33-72.

Yassin, A., Delaney, E.K., Reddiex, A.J., Seher, T.D., Bastide, H., Appleton, N.C., Lack, J.B., David, J.R., Chenoweth, S.F., Pool, J.E., *et al.* (2016). The *pdm3* Locus Is a Hotspot for Recurrent Evolution of Female-Limited Color Dimorphism in *Drosophila*. *Curr Biol* 26, 2412-2422.

Yokoyama, S. (2002). Molecular evolution of color vision in vertebrates. *Gene* 300, 69-78.

Zhang, W.-X., and Toda, M.J. (1988). The *Drosophila* *immigrans* species-group of the subgenus *Drosophila* (Diptera: Drosophilidae) in Yunnan, China. *Zool Sci* 5, 1095-1103.

Zhang, W.-X., and Toda, M.J. (1992). A new species-subgroup of the *Drosophila* *immigrans* species-group (Diptera, Drosophilidae), with descriptions of two new species from China and revision of taxonomic terminology. *Jpn J Genet* 60, 839-850.

Zhang, W.-X., Toda, M.J., and Watabe, H. (1995). Fourteen new species of the *Drosophila* (*Drosophila*) *immigrans* species group from the Oriental region. *Jpn J Genet* 63, 25-51.

Zwaan, B.J., Azevedo, R.B., James, A.C., Van 't Land, J., and Partridge, L. (2000). Cellular basis of wing size variation in *Drosophila melanogaster*: a comparison of latitudinal clines on two continents. *Heredity* 84 ( Pt 3), 338-347.



## Figure Legends

**Figure 1. Sex brush morphology in distantly related species.** (A, C, E, G, I, K) Brightfield images of the first and second tarsal segments (ta1 and ta2) of the prothoracic leg in males of six species. (B, D, F, H, J, L) SEM images of the ta1 sex brush. A-B) *D. pruinosa*. A) The brush occupies the distal ~80% of ta1, replacing most of the transverse bristle rows (TBRs, shown by brackets in this and other panels), which in females covers the entire anterior-ventral surface. The ta1 segment is slightly widened at the distal end. B) The tips of brush hairs are flattened, pointed, and form hooks that curve toward the base of the leg (see inset). C-D) *D. immigrans*. C) The brush covers the distal ~60% of ta1 and most of ta2. The shape of the segments is not modified. D) Similar to *D. pruinosa*, the brush hairs are flattened, pointed, and form proximally curving hooks at the tips (inset). E-F) *D. repletoides*. E) The brush covers ~70% of ta1 and most of ta2. Both segments are shortened and have a bulbous shape. F) The tips of brush hairs are flattened but thick and blunt. They form hooks that curve away from the leg base (inset). G-H) *Z. tuberculatus*. G) The brush covers the distal ~60% of ta1. H) The tips of brush hairs curve distally and have a pointed paddle-like shape with a slight depression (inset). I-J) *Z. vittiger*. K-L) *Z. bogoriensis*. These species have distally curving tips of brush hairs, similar to *Z. tuberculatus*.

**Figure 2. Sex brushes evolved independently at least three times.** Species and clades with male sex brushes are highlighted in blue. A) Bayesian phylogeny of the species represented in this study, based on the combined dataset. Numbers at each node indicate the posterior probabilities of the respective taxon bipartitions. B) Bayesian phylogeny based on the same dataset but excluding *D. quadrilineata*. Posterior probabilities of nodes A-E in different analyses can be found in Supplement Table 3.

**Figure 3. Sex brush development shows strong similarities across species.** Developing brush hair cells were visualized by immunostaining for membrane markers E-cadherin (DE-cad) or Armadillo (Arm). For each species, the upper panels show the confocal projections of ta1 segment (A-D, G-H) or both ta1 and ta2 (E-F). The bottom

panels (A'-H') show close-up views. For each species, early developmental stages are shown on the left and later stages on the right. A-B') *D. pruinosa*, 27 and 42 hrs after pupariation (AP). C-D') *D. immigrans*, 24 and 43 hrs AP. E-F') *D. repletoides*, 28 and 43 hrs AP. G-H') *Z. tuberculatus*, 34 and 48 hrs AP. Hair progenitor cells can be distinguished from epithelial cells by a ring of bright staining with a dense punctum in the middle. In all four species, each hair cell is surrounded by 4-6 epithelial cells (blue dots), so that neighboring hair cells are separated from each other by 1-2 cells, at both the early and the late stages. The proximal TBRs (square brackets) form by expelling the intervening epithelial cells, with the bristle progenitor cells migrating closer together to make straight rows (Tanaka et al 2009) (e.g., compare A vs B, and G vs H). In contrast, no cell rearrangement is observed in the brush.

**Supplement Figure 1.** Strict consensus of 11 trees with the cumulative posterior probability of 95% for the complete taxon sample, labeled as in Figure 1. Numbers at each node indicate the posterior probabilities of the respective taxon bipartitions.

**Supplement Figure 2.** Strict consensus of 11 trees with the cumulative posterior probability of 99% for the taxon sample without *D. quadrilineata*.

**Supplement Figure 3.** Bayesian phylogenetic tree for the complete taxon sample, with the dataset partitioned by gene and codon.

**Supplement Figure 4.** Phylogenetic tree for the taxon sample without *D. quadrilineata*, with the dataset partitioned by gene and codon.



*D. pruinosa*

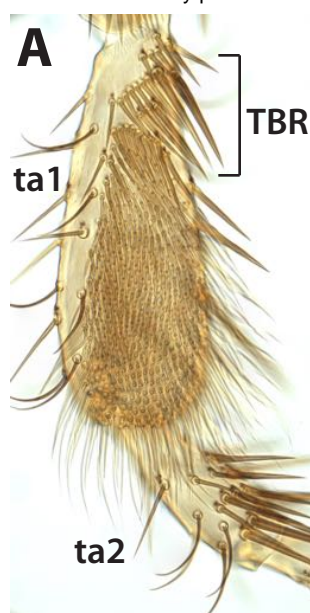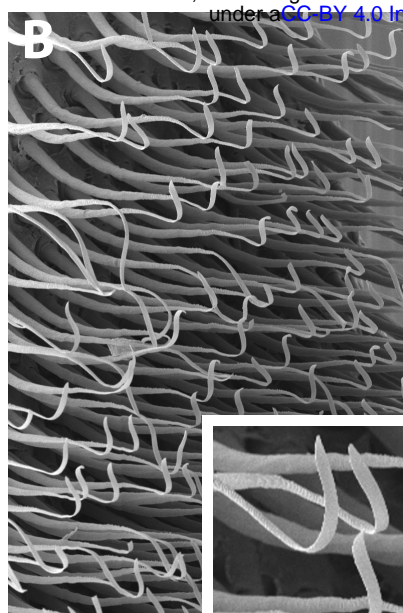

*D. immigrans*

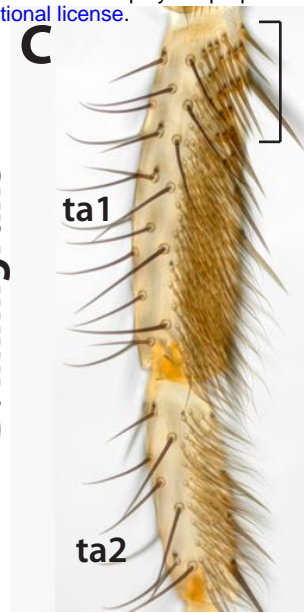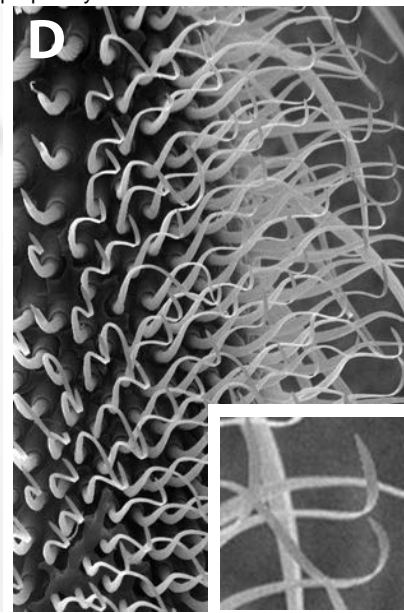

*D. repletoides*

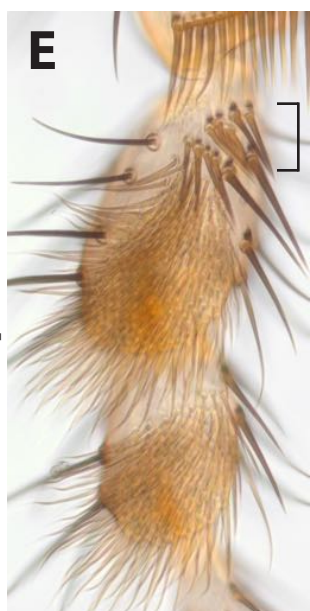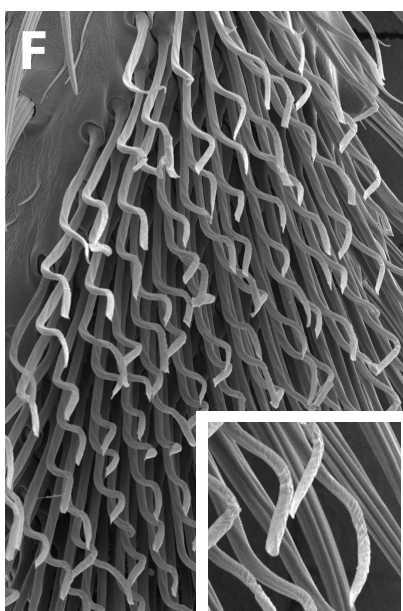

*Z. tuberculatus*

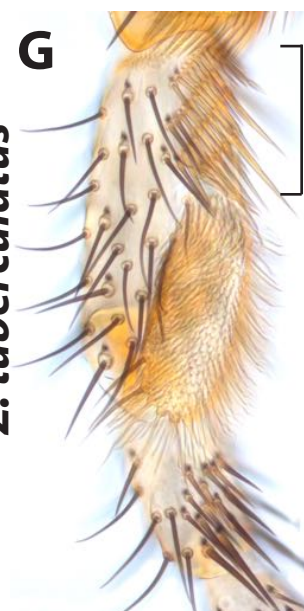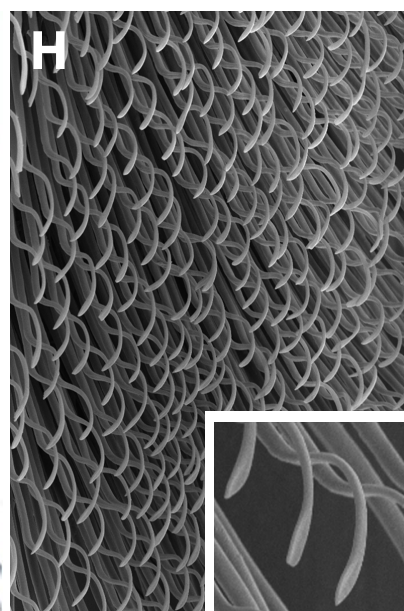

*Z. vittiger*

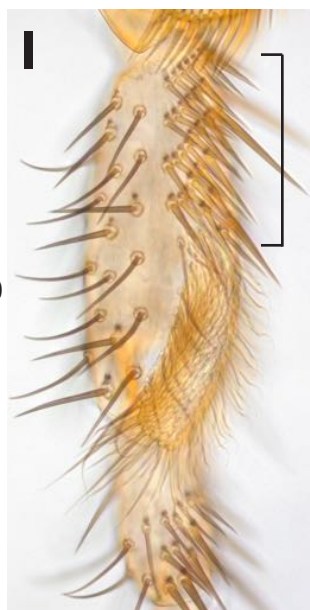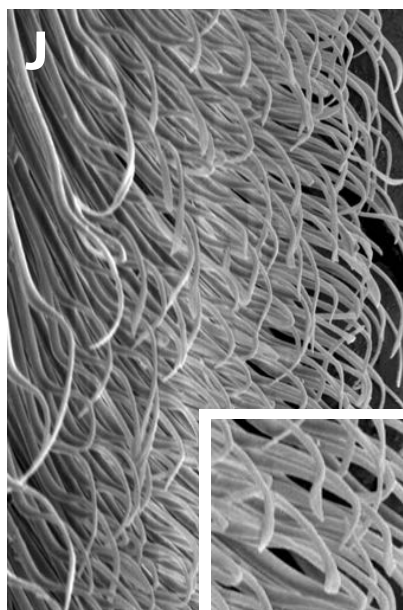

*Z. bogoriensis*

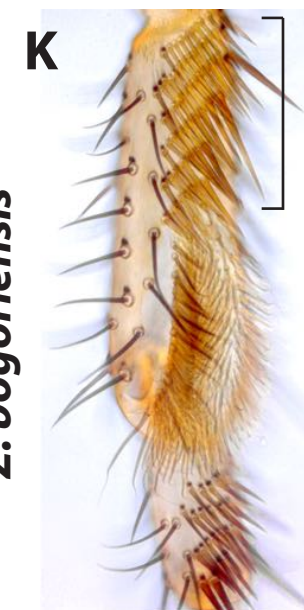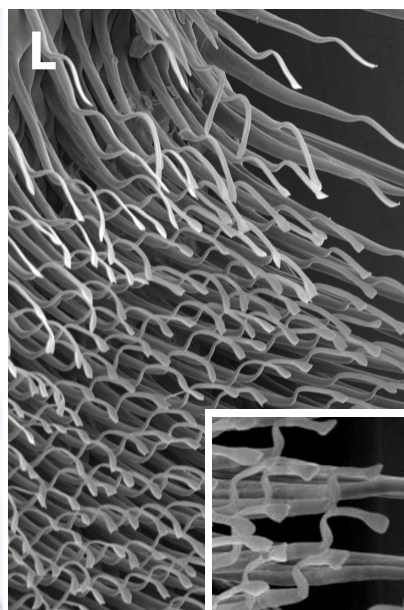

A

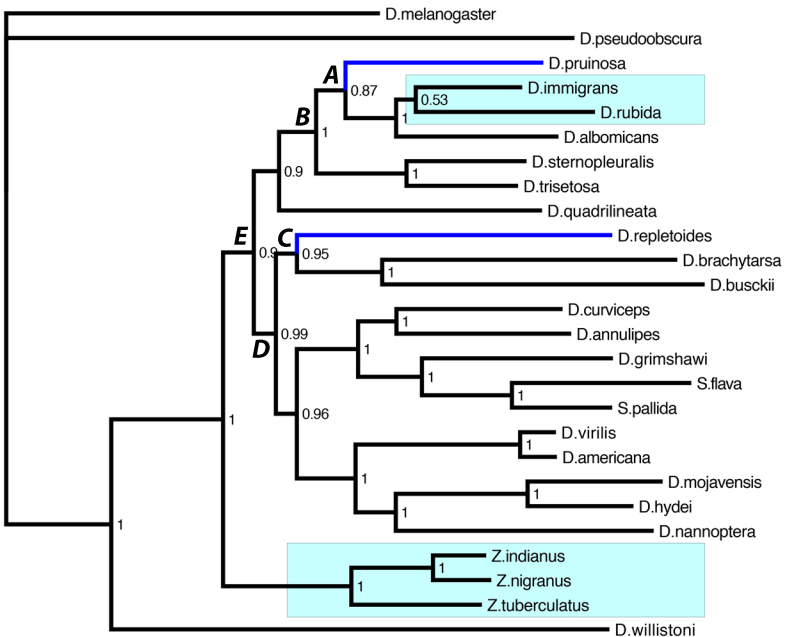

B

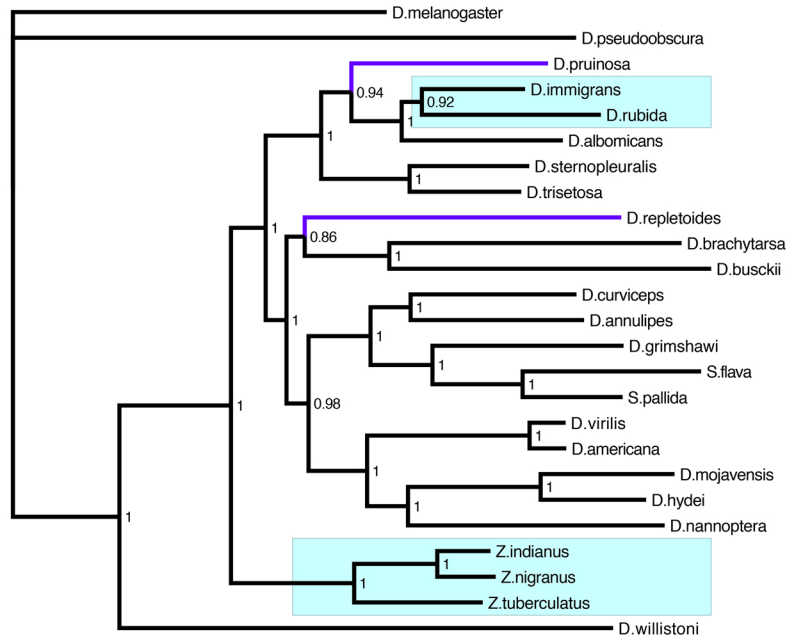



# *D. pruinosa*

# *D. immigrans*

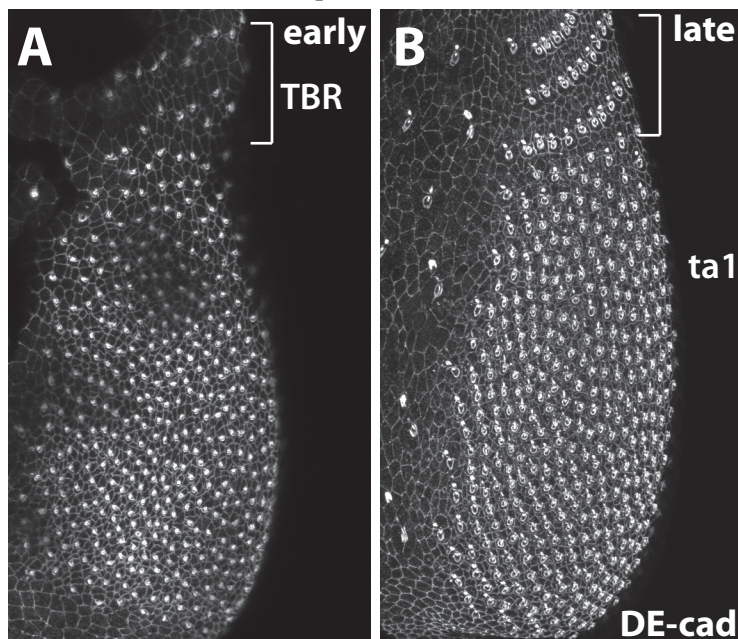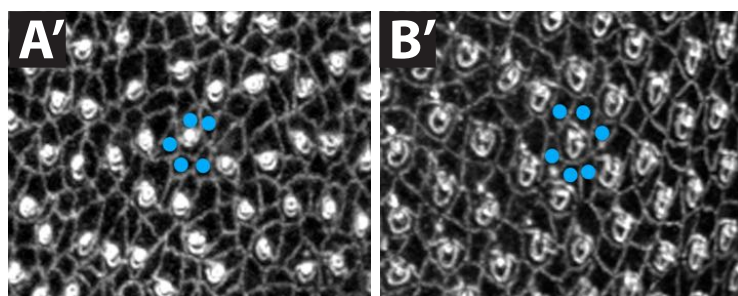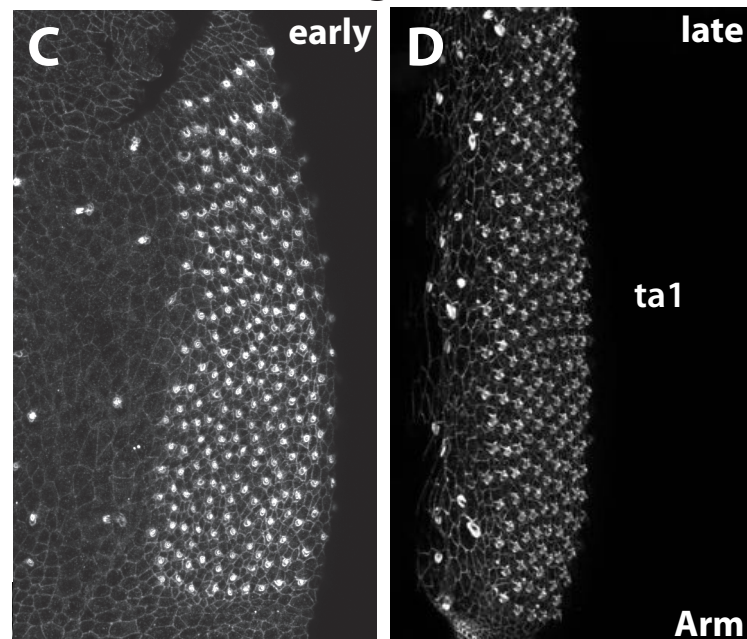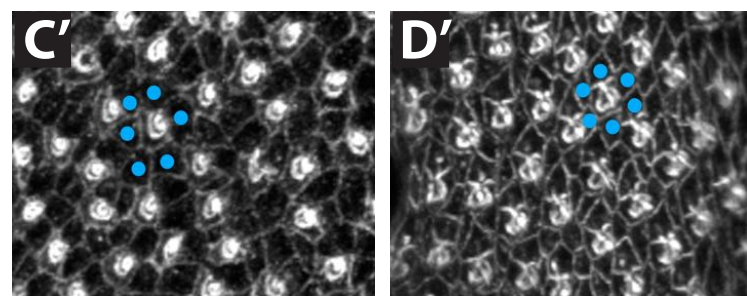

# *D. repletoidea*

# *Z. tuberculatus*

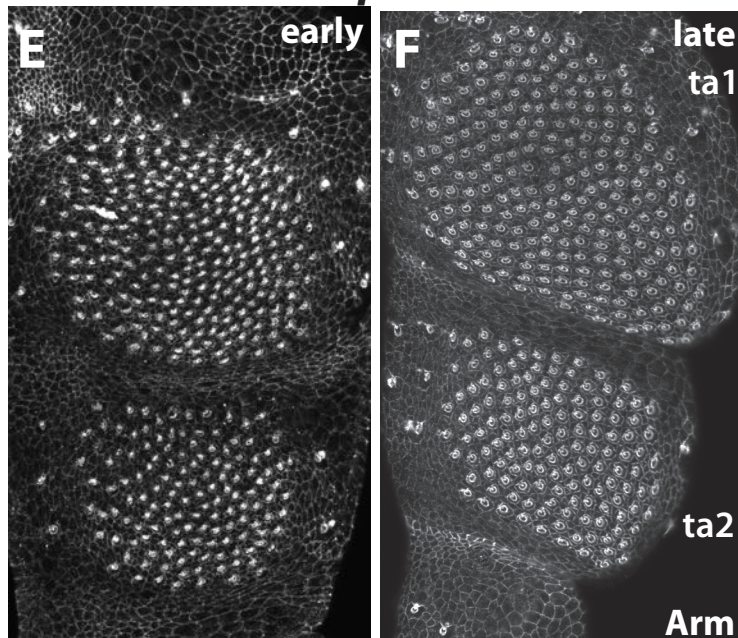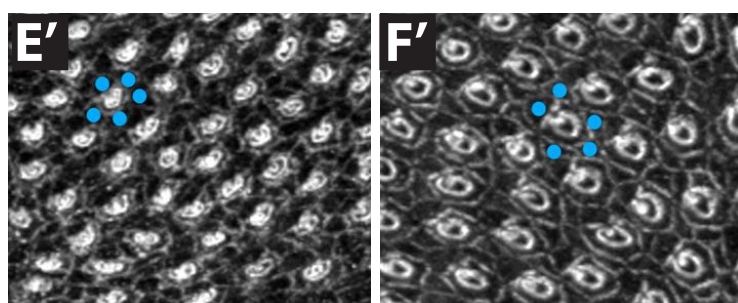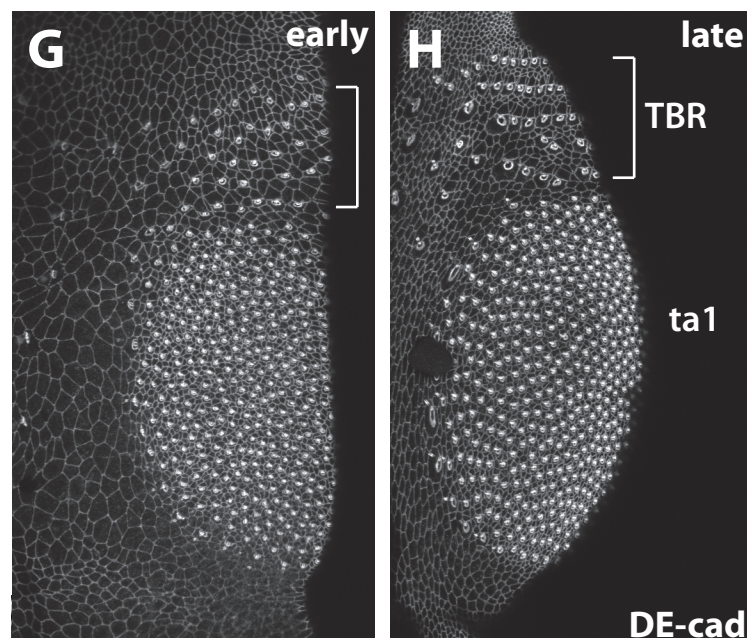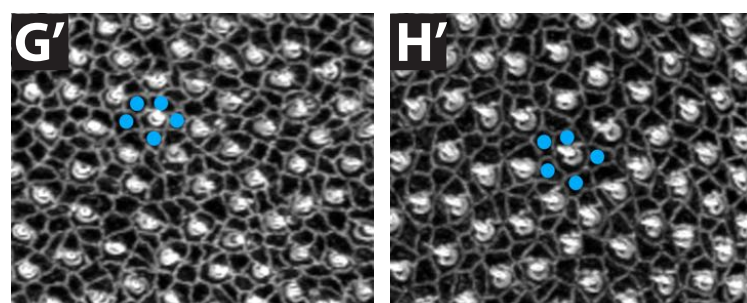

Source: https://www.biorxiv.org/content/10.1101/786764v1.full.pdf
